# Supplementary material for: GLP-1 Induces the Expression of FNDC5 Derivatives That Execute Lipolytic Actions
Source: Front Cell Dev Biol. 2021 Nov 11;9:777026. doi: 10.3389/fcell.2021.777026 (PMC8636013; doi:10.3389/fcell.2021.777026)
Supplement: Supplementary file 1 [file Table2.XLSX]

## Sheet: Figure 1
1A
Control		2		4		8		12		24		30
0.970555	1.03034	1.04676	1.06931	2.08533	1.88117	6.50107	5.62741	1.98843	1.9229	1.3473	1.45898	1.01359	1.0545
1C
Control		GLP-1 8h		GLP-1 24h
99.424	100.576	160.754	153.3	186.677	175.317
1D
Control		GLP-1		H89+GLP-1		LY294002+GLP-1		U0+GLP-1		SB+GLP-1
0.957459	1.04443	4.58796	4.47767	1.26476	1.48117	1.06826	0.877896	2.36513	2.30683	5.58105	5.6172
1F
	Control		CREB
0.5kb	0.941399	1.0586	1.44269	1.1831
0.7kb	0.926012	1.07399	1.38406	1.66499
1.4kb	1.09401	0.905993	1.93447	2.17849

## Sheet: Figure 2
2A					2F
	Control	Liraglutide				Control						Liraglutide
Mouse 1	1.00174	1.08314			0	113.299	80.3381	106.703	120.419	97.8258	81.4151	62.3995	153.874	88.129	80.5492	140.674	105.465
Mouse 2	0.644835	4.3772			8	132.512	107.656	91.2251	91.2806	101.629	75.6973	162.437	130.544	206.721	240.236	150.473	111.939
Mouse 3	0.0905584	2.49055
Mouse 4	1.06932	9.45362			2G
Mouse 5	1.96622	3.73249				Chew diet										HFD						HFD+GLP-1
Mouse 6	2.10718	7.64798			0	122.4	126	120.6	84.6	102.6	127.8	113.4	90	154.8	153	115.2	174.6	180	104.4	138.6	140.4	158.4	192.6	113.4	142.2	178.2	153	126	122.4
					15	43.2	43.2	81	66.6	75.6	95.4	51.3	34.2	77.4	55.8	106.2	88.2	90	95.4	147.6	57.6	118.4	92.6	83.4	92.2	88.2	103	126	122.4
2B					30	14.4	23.4	54	32.4	32.4	64.8	57.6	30.6	37.8	30.6	57.6	36	55.8	61.2	61.2	30.6	39.6	72	59.4	36	46.8	36	19.8	21.6
	Control	Liraglutide			60	12.6	25.2	23.4	16.2	21.6	37.8	48.6	25.2	28.8	28.8	162	27	36	28.8	30.6	12.6	41.4	28.8	50.4	21.6	14.4	10.8	30.6	10.8
Mouse 1	0.494315	2.14128			120	16.2	68.4	27	27	28.8	48.6	64.8	21.6	43.2	43.2	93.6	82.8	140.4	63	10.8	37.8	43.2	68.4	41.4	32.4	28.8	16.2	12.6	10.8
Mouse 2	1.41716	2.08671
Mouse 3	1.10074	1.49283
Mouse 4	1.49932	1.99591			2H
Mouse 5	0.954429	3.7089				Chew diet										HFD						HFD+GLP-1
Mouse 6		1.89435			0	82.8	79.2	73.8	104.4	75.6	81	86.4	73.8	93.6	77.4	169.2	264.6	232.2	156.6	176.4	160.2	113.4	138.6	126	142.2	174.6	171	169.2	154.8
					15	374.4	360	527.4	352.8	387	351	387	248.4	428.4	347.4	142.2	540	599.4	406.8	486	246.6	466.2	399.6	484.2	378	462.6	396	273.6	345.6
2D					30	338.4	428.4	333	352.8	405	347.4	432	307.8	334.8	397.8	372.6	466.2	599.4	599.4	595.8	457.2	421.2	435.6	441	446.4	392.4	507.6	324	313.2
	Control	Liraglutide			60	329.4	257.4	217.8	226.8	248.4	415.8	340.2	271.8	237.6	235.8	599.4	505.8	518.4	545.4	514.8	599.4	181.8	219.6	306	297	300.6	433.8	264.6	171
Mouse 1	1.27984	0.718222			120	219.6	149.4	118.8	199.8	214.2	158.4	185.4	115.2	135	133.2	343.8	302.4	291.6	367.2	255.6	255.6	151.2	176.4	156.6	165.6	160.2	252	201.6	113.4
Mouse 2	0.817902	1.61967
Mouse 3	0.856911	2.0113
Mouse 4	0.978157	2.50716
Mouse 5	1.57635	2.47335
Mouse 6	0.564952

## Sheet: Figure 3
3C
Lift	Control		GLP-1			Right	Control		GLP-1
FNDC5	1.0111	0.989019	1.79219	1.81286		FNDC5	0.992333	1.00773	1.72929	2.09868
ATGL	0.927678	1.07796	1.65841	1.81115		ATGL	1.01405	0.986141	1.08666	0.896398
HSL	1.14319	0.874746	7.40698	8.43509		HSL	1.10818	0.902383	0.808702	1.10949
LIPC	1.07647	0.928961	1.79592	2.08191		LIPC	1.0462	0.955844	1.36603	1.27847
3D
Lift	Control		GLP-1			Right	Control		GLP-1
ATG5	1.05627	0.946728	2.37143	2.07649		ATG5	0.993945	1.00609	0.983898	0.991624
ATG12	1.04525	0.956707	1.55442	1.53895		ATG12	1.01607	0.984185	1.12614	1.08866
ATG7	0.929437	1.07592	2.37167	2.50893		ATG7	0.95395	1.04827	0.820558	0.812708
ATG6	1.07144	0.933323	2.05599	2.18571		ATG6	0.92918	1.07622	1.2059	1.38336
3B
GLP-1 0h				GLP-1 24h
99.1921	98.5208	96.3625	105.925	82.8972	98.856	81.8569	85.9124

## Sheet: Figure 4
4E
Lift	Control		GLP-1			Right	Control		GLP-1
ATGL	1.01879	0.981561	1.47462	1.5201		ATGL	1.00856	0.991514	1.82642	1.76355
HSL	0.946707	1.05629	3.81614	4.13286		HSL	0.928837	1.07662	2.7113	2.29274
LIPC	0.970986	1.02988	2.76366	3.10572		LIPC	1.04633	0.955719	3.16982	3.38657
4F
Lift	Control		GLP-1			Right	Control		GLP-1
ATG5	0.974135	1.02655	1.58736	1.4139		ATG5	0.925829	1.08011	1.38953	1.33203
ATG12	0.943413	1.05998	1.39766	1.2967		ATG12	1.07227	0.932603	0.70438	0.784869
ATG7	1.07082	0.933861	1.42981	1.28367		ATG7	1.07262	0.932297	1.08995	1.11317
ATG6	0.964581	1.03672	1.79883	1.60609		ATG6	1.02847	0.97232	0.921891	1.10538

## Sheet: Figure 5
5A
UCP-1
		r-sFNDC5								GLP-1
Ctr		2		10		50		100		10		100
0.82932	1.20581	2.54912	1.97246	1.27015	1.27899	9.51366	8.05564	6.23332	6.32033	1.95206	1.44894	0.920188	1.01396
Cidea
		r-sFNDC5								GLP-1
Ctr		2		10		50		100		10		100
1.02456	0.976032	3.5186	2.37019	2.46229	2.96905	11.5915	12.3377	5.91755	6.6116	2.23457	1.8025	1.01045	0.760489
TMEM26
		r-sFNDC5								GLP-1
Ctr		2		10		50		100		10		100
1.03527	0.965936	3.18215	3.75809	3.04196	2.74157	6.72717	7.06162	5.85634	5.1337	1.19334	1.21841	1.44393	1.21419
PRDM16
		r-sFNDC5								GLP-1
Ctr		2		10		50		100		10		100
0.965936	1.03527	5.20537	6.10504	5.52127	5.48313	12.6407	14.2215	11.6318	13.5479	1.74715	1.25266	1.79005	1.7411
ATGL
		r-sFNDC5								GLP-1
Ctr		2		10		50		100		10		100
1.00696	0.993092	1.26138	1.46917	0.699793	0.82645	0.97942	0.888843	1.32409	1.37078	0.541488	0.643941	0.795536	0.650671
LIPC
		r-sFNDC5								GLP-1
Ctr		2		10		50		100		10		100
0.91067	1.09809	2.81864	3.02095	2.0209	1.88557	6.21175	5.95871	9.74728	9.41525	1.8025	1.40444	1.11342	1.21841
HSL
		r-sFNDC5								GLP-1
Ctr		2		10		50		100		10		100
0.976032	1.02456	1.34723	1.50525	0.888843	1.01396	1.44894	1.28788	1.45397	1.41421	0.503478	0.619854	0.70466	0.690159
PPARa
		r-sFNDC5								GLP-1
Ctr		2		10		50		100		10		100
0.82932	1.20581	2.32947	2.23457	1.52098	2.09217	9.25351	10.2674	5.79577	7.23503	0.72951	0.694959	0.949342	0.873573
PGC1a
		r-sFNDC5								GLP-1
Ctr		2		10		50		100		10		100
1.01045	0.989657	3.49429	3.04196	2.05623	2.25012	2.79917	3.08442	3.26029	3.44618	1.25701	1.02101	0.78187	0.734584
Adipoq
		r-sFNDC5								GLP-1
Ctr		2		10		50		100		10		100
1.02456	0.976032	0.675955	0.78187	0.809442	0.867539	1.83858	1.93858	1.27015	1.48968	0.913831	0.933033	0.765779	0.64842

## Sheet: Figure 6
6A
	Chow Diet	HFD	HFD+sFNDC5	HFD+IRISIN
Mouse 1	0.2436	1.469	0.99	0.651
Mouse 2	0.2614	1.4094	1.217	0.864
Mouse 3	0.2463	0.8346	0.988	1.2
Mouse 4	0.1976	1.2957	0.991	1.108
Mouse 5	0.249	1.0367	1.249	1.195
Mouse 6	0.2786	1.333	1.123	1.4941
Mouse 7	0.249	1.517	1.036	1.34
Mouse 8	0.238	1.347	0.786	1.239
Mouse 9	0.2047	1.532	1.121	1.43
6B
	Before injection							After injection(14)
Chew diet	28.2	25.94	25.56	26.53	26.58	28.84	27.61	26.41	28.46	26.97	26.98	27.45	25.57	28.53	27.57	26.92
Control	37.79	43.26	44.21	36.34	39.26	37.54	30.51	30.62	39.04	43.96	46.79	38.02	37.66	35.15	32.01	32.23
sFNDC5	34.78	34.29	37.9	33.1	32.74	34.74	39.23	38.12	30.19	32.71	35.49	32.66	31.68	33.2	38.95	37.79
IRISIN	34.37	34.05	36.74	35.81	34.96	37.63	37.84	37.36	31.18	32.1	35.87	34.68	34.43	38.21	39.37	38.41
6C
GTT	Chow diet									HFD									HFD+sFNDC5									HFD+IRISIN
0	127.8	124.2	87.2	116.8	81	90.4	117	94.8	116.8	153.4	149.4	142.2	150.8	131.4	133.2	173.8	126.2	124.2	133.2	131.4	81	109.8	104.4	147.6	52.2	64.8	41.4	138.6	138.6	140.4	138.6	111.6	183.6	154.8	172.8	142.2
15	599.4	599.4	383.4	444.6	333	577.8	439.2	594	489.6	595.8	486	599.4	599.4	599.4	599.4	446.4	576	599.4	507.6	531	480.6	599.4	599.4	561.6	345.6	365.4	338.4	421.2	570.6	599.4	271.8	599.4	547.2	599.4	599.4	379.8
30	424.8	599.4	545.4	495	424.8	500.4	423	541.8	462.6	599.4	599.4	599.4	599.4	572.4	599.4	487.8	599.4	599.4	532.8	599.4	543.6	599.4	554.4	574.2	599.4	599.4	556.2	595.8	554.4	599.4	390.6	599.4	599.4	599.4	599.4	408.6
60	185.4	399.6	250.2	327.6	298.8	315	311.4	315	302.4	599.4	599.4	599.4	597.6	498.6	507.6	500.4	599.4	599.4	454.4	450.8	469.5	417.3	399.4	409.4	513	381.6	307.6	405	511.2	439.6	268.2	419.6	599.4	459.6	549.1	599.4
120	142.2	158.4	190.8	185.4	133.2	174.6	181.8	131.4	174.6	460.8	516.6	396	473.4	226.8	480.6	399.6	451.8	457.2	392.4	302.4	369	306	266.4	270	316.8	228.6	180	223.2	300.6	334.8	172.8	313.2	398.7	400.4	438.6	436.2
GTT AUC
Chow diet			HFD			HFD+sFNDC5			HFD+IRISIN
Mean	SD	N	Mean	SD	N	Mean	SD	N	Mean	SD	N
1422	95.09	9	2004	73.69	9	1671	95.73	9	1773	138	9
ITT	Chow diet							HFD							HFD+sFNDC5							HFD+IRISIN
0	112.8	136.4	109.4	129.6	101.2	135	107.4	169.2	154.8	147.6	133.2	169	178.2	147.6	120.6	120.6	190.8	109.8	149	145.8	169.2	147.6	156.6	142.2	136.8	142.6	147.6	123.2
15	64.8	68.4	50.4	66.6	93.6	73.8	59.4	88.2	120.6	118.8	93.6	88.2	127.2	104.4	100.8	70.2	108	82.8	124.4	112.4	84.6	100.6	79.2	94.2	103.2	91.4	84.6	75.6
30	39.6	72	48.6	37.8	69.2	59.4	64.8	66.6	106.2	64.8	66.6	43.2	86.4	84.6	77.4	57.6	124.2	63	118.8	66.6	45	63	67.4	79.2	95.4	55.8	66.6	64.8
60	43.2	50.4	48.6	32.4	57.6	41.4	36	43.2	79.2	75.6	63.2	45	75.6	66.6	41.4	23.4	64.8	66.6	86.4	43.2	41.4	64.8	56.4	63	75.6	41.4	73.8	48.6
120	84.6	66.6	70.2	63	108	46.8	39.6	115.2	122.4	153.4	115.8	122.4	118.8	122.4	109.8	61.2	109	64.8	91.8	63	89	92.4	90.6	84.6	101.6	108	113.8	79.8
ITT AUC
Chow diet			HFD			HFD+sFNDC5			HFD+IRISIN
Mean	SD	N	Mean	SD	N	Mean	SD	N	Mean	SD	N
Chew diet			HFD			HFD+sFNDC5			HFD+IRISIN
261.9	20.25	7	384.7	23.5	7	342	34	7	339.8	16.9	7
6D
Cholesterol(mmol/l)
Chow diet					HFD					HFD+sFNDC5					HFD+IRISIN
2.57	2.46	2.5	2.03	2.48	4.67	4.16	3.97	3.93	3.76	3.45	3.71	3.28	3.29	3.65	3.66	3.57	3.62	3.7	3.63
Triglyceride(mmol/l)
Chow diet					HFD					HFD+sFNDC5					HFD+IRISIN
1.64	1.14	1.77	1.99	2.06	2	1.84	1.75	3.03	2.49	0.98	1.5	1.39	0.71	1.21	1.34	1.35	1.68	1.27	1.79
FFA(mmol/l)
Chow diet					HFD					HFD+sFNDC5					HFD+IRISIN
0.47	0.47	0.36	0.39	0.34	0.72	0.7	0.97	0.98	0.84	0.66	0.77	0.67	0.47	0.6	0.79	0.63	0.68	0.66	0.92
6E
Chow diet				HFD				HFD+sFNDC5						HFD+IRISIN
1085.74	1558.53	1639.59	2399.34	8839.8	6457.74	8881.96	10708.9	2565.24	3007.61	2035.63	2926.4	3592.2	1465.82	2132.24	4392.2	3405.53	4877.16
6F
Chow diet			HFD				HFD+sFNDC5					HFD+IRISIN
3430.63	3709.73	4456.97	12373.4	12336.5	13465.3	12998.6	7269.78	8858.74	7335.74	10914.7	8867.24	10826.1	9775.6	5882.58	10852.2
6H
Up	HFD						HFD+r-sFNDC5						HFD+r-irisin
UCP-1	0.4402	0.778	1.8333	0.3105	0.6175	0.3207	2.87344	2.0248	9.564	4.1779	6.787	1.6427	9.6367	8.3433	9.5683	9.0733	8.7367	10.538
PRDM16	1.1436	1.2837	1.0083	1.7175	0.4887	0.8049	2.7043	1.395	1.7036	1.8196	2.3543	1.3274	1.7334	1.7556	2.357	2.9731	2.9355	1.4661
Cidea	2.5837	0.83	1.8762	0.9114	0.5815	0.469	2.7153	1.7007	7.67116	2.2886	2.4135	4.0684	0.8612	4.5718	1.6968	3.4648	4.6571	1.0738
CPT1	1.4923	2.0291	1.0564	0.4355	0.8924	0.8043	1.2519	1.8329	2.5713	1.1051	2.8432	1.7142	1.5236	1.2065	2.4382	2.1975	2.1772	1.0467
ATGL	1.8736	1.7705	1.0528	1.1789	0.226	1.0749	2.3579	1.9086	0.8108	2.0646	1.5131	2.7054	2.0291	2.3201	1.7767	1.9577	2.5683	0.4188
HSL	1.7542	1.7522	1.127	0.2422	1.2177	0.9789	1.9352	1.902	2.5683	1.1507	2.9708	1.2009	1.6828	2.1423	2.0982	1.7828	2.3389	0.7215
LIPC	1.0359	0.5032	1.5902	1.2205	2.1202	0.4662	4.667	1.4167	1.4216	7.8128	2.22042	6.0106	2.1226	6.3606	4.7871	6.2297	3.4244	2.7305
TFAM	0.9107	1.4931	1.158	1.0023	0.6213	1.0198	3.5967	1.5764	1.9319	1.0867	3.0455	1.244	1.5966	2.4594	3.0384	2.6635	2.9794	2.1411
Down	HFD						HFD+r-sFNDC5						HFD+r-irisin
UCP-1	0.7411	0.7471	0.6971	1.898	1.1259	1.2123	1.0763	4.207	6.21654	2.5837	1.2889	3.9708	2.3996	1.1656	3.2216	4.5089	3.6497	2.1877
PRDM16	1.3452	2.1877	0.5944	1.3054	0.7101	0.6168	1.8675	4.0077	1.1181	1.2522	1.0433	1.0349	3.6878	1.3718	4.5403	1.9156	1.6052	1.8848
Cidea	0.2803	0.3504	1.6551	1.7801	1.8643	1.8535	2.3272	8.598	2.2793	1.1344	1.1476	1.1305	1.5914	2.4261	1.8925	1.4047	0.9268	0.5575
CPT1	0.490701	1.55608	1.12994	1.15903			1.33445	1.17657	1.76286	1.83772	1.15502		1.1644	2.15534	1.48238	0.913568
ATGL	0.8717	1.3366	1.1436	0.6706	1.0177	1.0996	1.1344	1.137	0.9473	0.9594	1.3758	1.0932	0.6919	1.2019	0.7032	0.8411	1.6229	0.8059
HSL	1.0271	1.4492	0.9014	0.5666	1.0259	1.2822	0.704	1.2371	0.8401	0.9979	1.2763	1.1449	0.633	1.1623	0.5171	1.2371	2.235	1.1059
LIPC	1.6155	1.7214	0.7811	1.7455	0.7373	0.3577	2.3515	3.9869	4.8633	1.9866	1.5969	0.7866	1.1021	4.2436	4.63299	1.6763	1.23	1.7036
TFAM	1.4251	2.0108	0.9156	0.7807	0.6851	0.7126	1.4669	1.7832	2.4899	0.9424	1.4088	1.0776	0.6891	1.8206	2.5073	0.9927	1.4669	1.2165
6J
	HFD				HFD+r-sFNDC5					HFD+r-irisin
Acox1	1.00001	0.878131	0.949622	1.20166	2.54105	2.20011	1.74412	2.13695	1.2549	1.56921	1.56262	0.934674	0.91701	2.32959
Hmgcs	1.01505	1.25968	1.09116	1.12162	1.72992	2.55055	1.37346	2.13614	1.14682	1.40366	2.1487	1.72012	1.63018	1.83205
Cyp4a10	1.00001	1.53425	1.14589	1.50008	1.45411	2.20769	1.26798	3.04196	1.09643	3.60925	3.18896	3.52489	3.93187	5.35165
PPARα	1	1.00173	0.898154	1.03536	1.69937	2.71806	1.30361	2.34618	1.31726	1.85719	1.76864	1.4479	2.07114	1.94531
